# Supplementary material for: Human immunodeficiency virus-1 induces host genomic R-loops and preferentially integrates its genome near the R-loop regions
Source: eLife. 2024 Dec 3;13:RP97348. doi: 10.7554/eLife.97348 (PMC11616997; doi:10.7554/eLife.97348)
Supplement: Figure 1—figure supplement 2—source data 1. [file elife-97348-fig1-figsupp2-data1.xlsx]

## Sheet: Sheet1
HeLa
Gene	Chromosom	Position (hg38)	Description	Average DRIPc-seq signal
RPL13A	chr19	49487608-49493057	Input (-)_0hpi	3.5869
			Input (-)_3hpi	0.240287
			Input (-)_6hpi	2.38692
			Input (-)_12hpi	3.51184
			Input (+)_0hpi	82.2917
			Input (+)_3hpi	51.7607
			Input (+)_6hpi	39.1444
			Input (+)_12hpi	176.726
			IP_RNase H- (-)_0hpi	2.20715
			IP_RNase H- (-)_3hpi	2.72556
			IP_RNase H- (-)_6hpi	2.39375
			IP_RNase H- (-)_12hpi	4.24524
			IP_RNase H- (+)_0hpi	110.317
			IP_RNase H- (+)_3hpi	140.218
			IP_RNase H- (+)_6hpi	58.3625
			IP_RNase H- (+)_12hpi	137.365
			IP_RNase H+ (-)_0hpi	0
			IP_RNase H+ (-)_3hpi	4.48488
			IP_RNase H+ (-)_6hpi	3.74494
			IP_RNase H+ (-)_12hpi	0
			IP_RNase H+ (+)_0hpi	1.98156
			IP_RNase H+ (+)_3hpi	3.36062
			IP_RNase H+ (+)_6hpi	1.59718
			IP_RNase H+ (+)_12hpi	6.80624
Gene	Chromosom	Position (hg38)	Description	Average DRIPc-seq signal
CALM3	chr19	46601330-46610782	Input (-)_0hpi	1.46814
			Input (-)_3hpi	1.02217
			Input (-)_6hpi	2.46097
			Input (-)_12hpi	0.74181
			Input (+)_0hpi	26.5033
			Input (+)_3hpi	19.9539
			Input (+)_6hpi	11.6097
			Input (+)_12hpi	56.9213
			IP_RNase H- (-)_0hpi	0.897315
			IP_RNase H- (-)_3hpi	1.53544
			IP_RNase H- (-)_6hpi	1.23008
			IP_RNase H- (-)_12hpi	1.72998
			IP_RNase H- (+)_0hpi	13.9723
			IP_RNase H- (+)_3hpi	28.6843
			IP_RNase H- (+)_6hpi	10.5814
			IP_RNase H- (+)_12hpi	24.702
			IP_RNase H+ (-)_0hpi	0.705208
			IP_RNase H+ (-)_3hpi	1.82882
			IP_RNase H+ (-)_6hpi	2.78421
			IP_RNase H+ (-)_12hpi	1.04471
			IP_RNase H+ (+)_0hpi	2.11768
			IP_RNase H+ (+)_3hpi	1.64297
			IP_RNase H+ (+)_6hpi	2.25615
			IP_RNase H+ (+)_12hpi	1.6521
Gene	Chromosom	Position (hg38)	Description	Average DRIPc-seq signal
SNRPN	chr15	24823647-24978582	Input (-)_0hpi	1.45547
			Input (-)_3hpi	1.26719
			Input (-)_6hpi	1.33574
			Input (-)_12hpi	1.76249
			Input (+)_0hpi	1.20792
			Input (+)_3hpi	0.805603
			Input (+)_6hpi	1.25081
			Input (+)_12hpi	0.408289
			IP_RNase H- (-)_0hpi	0.449902
			IP_RNase H- (-)_3hpi	0.470943
			IP_RNase H- (-)_6hpi	0.370729
			IP_RNase H- (-)_12hpi	0.045098
			IP_RNase H- (+)_0hpi	0.369243
			IP_RNase H- (+)_3hpi	0.241136
			IP_RNase H- (+)_6hpi	0.541594
			IP_RNase H- (+)_12hpi	0.068314
			IP_RNase H+ (-)_0hpi	1.39532
			IP_RNase H+ (-)_3hpi	0.930002
			IP_RNase H+ (-)_6hpi	1.10193
			IP_RNase H+ (-)_12hpi	1.3148
			IP_RNase H+ (+)_0hpi	1.18374
			IP_RNase H+ (+)_3hpi	1.12099
			IP_RNase H+ (+)_6hpi	1.25649
			IP_RNase H+ (+)_12hpi	1.10402
