# Supplementary material for: Human immunodeficiency virus-1 induces host genomic R-loops and preferentially integrates its genome near the R-loop regions
Source: eLife. 2024 Dec 3;13:RP97348. doi: 10.7554/eLife.97348 (PMC11616997; doi:10.7554/eLife.97348)
Supplement: Figure 1—figure supplement 3—source data 1. [file elife-97348-fig1-figsupp3-data1.xlsx]

## Sheet: Sheet1
CD4+
Gene	Chromosom	Position (hg38)	Description	Average DRIPc-seq signal
RPL13A	chr19	49487608-49493057	Input (-)_0hpi	2.33415
			Input (-)_3hpi	1.51344
			Input (-)_6hpi	2.55936
			Input (-)_12hpi	0.765189
			Input (+)_0hpi	2.90814
			Input (+)_3hpi	1.93713
			Input (+)_6hpi	2.35943
			Input (+)_12hpi	2.18647
			IP_RNase H- (-)_0hpi	0
			IP_RNase H- (-)_3hpi	3.63223
			IP_RNase H- (-)_6hpi	0
			IP_RNase H- (-)_12hpi	0
			IP_RNase H- (+)_0hpi	144.193
			IP_RNase H- (+)_3hpi	77.2632
			IP_RNase H- (+)_6hpi	130.863
			IP_RNase H- (+)_12hpi	190.078
			IP_RNase H+ (-)_0hpi	1.41541
			IP_RNase H+ (-)_3hpi	0
			IP_RNase H+ (-)_6hpi	0
			IP_RNase H+ (-)_12hpi	0
			IP_RNase H+ (+)_0hpi	0.933066
			IP_RNase H+ (+)_3hpi	0
			IP_RNase H+ (+)_6hpi	0
			IP_RNase H+ (+)_12hpi	2.27638
Gene	Chromosom	Position (hg38)	Description	Average DRIPc-seq signal
CALM3	chr19	46601330-46610782	Input (-)_0hpi	4.58068
			Input (-)_3hpi	4.64267
			Input (-)_6hpi	2.96462
			Input (-)_12hpi	4.03773
			Input (+)_0hpi	3.62164
			Input (+)_3hpi	3.65231
			Input (+)_6hpi	3.39797
			Input (+)_12hpi	4.1079
			IP_RNase H- (-)_0hpi	0
			IP_RNase H- (-)_3hpi	0
			IP_RNase H- (-)_6hpi	0
			IP_RNase H- (-)_12hpi	2.70451
			IP_RNase H- (+)_0hpi	108.234
			IP_RNase H- (+)_3hpi	183.797
			IP_RNase H- (+)_6hpi	87.7281
			IP_RNase H- (+)_12hpi	181.803
			IP_RNase H+ (-)_0hpi	2.79665
			IP_RNase H+ (-)_3hpi	0
			IP_RNase H+ (-)_6hpi	0
			IP_RNase H+ (-)_12hpi	1.94274
			IP_RNase H+ (+)_0hpi	4.1095
			IP_RNase H+ (+)_3hpi	1.18759
			IP_RNase H+ (+)_6hpi	9.87971
			IP_RNase H+ (+)_12hpi	6.16917
Gene	Chromosom	Position (hg38)	Description	Average DRIPc-seq signal
SNRPN	chr15	24823647-24978582	Input (-)_0hpi	1.65138
			Input (-)_3hpi	1.41195
			Input (-)_6hpi	1.74015
			Input (-)_12hpi	1.15398
			Input (+)_0hpi	1.7182
			Input (+)_3hpi	1.45594
			Input (+)_6hpi	1.97241
			Input (+)_12hpi	1.29182
			IP_RNase H- (-)_0hpi	0.307141
			IP_RNase H- (-)_3hpi	0.267755
			IP_RNase H- (-)_6hpi	0.104706
			IP_RNase H- (-)_12hpi	0.271498
			IP_RNase H- (+)_0hpi	0.980628
			IP_RNase H- (+)_3hpi	0.996151
			IP_RNase H- (+)_6hpi	0.525089
			IP_RNase H- (+)_12hpi	0.556233
			IP_RNase H+ (-)_0hpi	0.943168
			IP_RNase H+ (-)_3hpi	1.56631
			IP_RNase H+ (-)_6hpi	0
			IP_RNase H+ (-)_12hpi	2.17377
			IP_RNase H+ (+)_0hpi	1.36894
			IP_RNase H+ (+)_3hpi	1.13949
			IP_RNase H+ (+)_6hpi	1.42472
			IP_RNase H+ (+)_12hpi	1.19226
