# Supplementary material for: Human immunodeficiency virus-1 induces host genomic R-loops and preferentially integrates its genome near the R-loop regions
Source: eLife. 2024 Dec 3;13:RP97348. doi: 10.7554/eLife.97348 (PMC11616997; doi:10.7554/eLife.97348)
Supplement: Figure 1—figure supplement 4—source data 1. [file elife-97348-fig1-figsupp4-data1.xlsx]

## Sheet: Sheet1
Jurkat
Gene	Chromosom	Position (hg38)	Description	Average DRIPc-seq signal
RPL13A	chr19	49487608-49493057	Input (-)_0hpi	1.45916
			Input (-)_3hpi	1.9213
			Input (-)_6hpi	1.92314
			Input (-)_12hpi	1.58167
			Input (+)_0hpi	1.39703
			Input (+)_3hpi	2.01571
			Input (+)_6hpi	1.15272
			Input (+)_12hpi	1.54042
			IP_RNase H- (-)_0hpi	0
			IP_RNase H- (-)_3hpi	10.1696
			IP_RNase H- (-)_6hpi	9.59732
			IP_RNase H- (-)_12hpi	2.64202
			IP_RNase H- (+)_0hpi	404.405
			IP_RNase H- (+)_3hpi	183.883
			IP_RNase H- (+)_6hpi	486.496
			IP_RNase H- (+)_12hpi	526.25
			IP_RNase H+ (-)_0hpi	0
			IP_RNase H+ (-)_3hpi	3.53156
			IP_RNase H+ (-)_6hpi	0
			IP_RNase H+ (-)_12hpi	0
			IP_RNase H+ (+)_0hpi	6.12785
			IP_RNase H+ (+)_3hpi	0
			IP_RNase H+ (+)_6hpi	0
			IP_RNase H+ (+)_12hpi	0
Gene	Chromosom	Position (hg38)	Description	Average DRIPc-seq signal
CALM3	chr19	46601330-46610782	Input (-)_0hpi	2.40431
			Input (-)_3hpi	2.1789
			Input (-)_6hpi	2.2609
			Input (-)_12hpi	2.78057
			Input (+)_0hpi	2.08486
			Input (+)_3hpi	2.7834
			Input (+)_6hpi	1.99199
			Input (+)_12hpi	2.37809
			IP_RNase H- (-)_0hpi	0
			IP_RNase H- (-)_3hpi	11.7333
			IP_RNase H- (-)_6hpi	5.58219
			IP_RNase H- (-)_12hpi	5.22353
			IP_RNase H- (+)_0hpi	208.247
			IP_RNase H- (+)_3hpi	182.669
			IP_RNase H- (+)_6hpi	167.978
			IP_RNase H- (+)_12hpi	220.298
			IP_RNase H+ (-)_0hpi	0
			IP_RNase H+ (-)_3hpi	2.03591
			IP_RNase H+ (-)_6hpi	0
			IP_RNase H+ (-)_12hpi	4.83821
			IP_RNase H+ (+)_0hpi	13.8406
			IP_RNase H+ (+)_3hpi	1.61794
			IP_RNase H+ (+)_6hpi	4.37472
			IP_RNase H+ (+)_12hpi	3.28541
Gene	Chromosom	Position (hg38)	Description	Average DRIPc-seq signal
SNRPN	chr15	24823647-24978582	Input (-)_0hpi	1.74784
			Input (-)_3hpi	1.93543
			Input (-)_6hpi	1.86787
			Input (-)_12hpi	1.83685
			Input (+)_0hpi	1.85968
			Input (+)_3hpi	1.88697
			Input (+)_6hpi	1.81352
			Input (+)_12hpi	1.73378
			IP_RNase H- (-)_0hpi	0.120887
			IP_RNase H- (-)_3hpi	0
			IP_RNase H- (-)_6hpi	0.174041
			IP_RNase H- (-)_12hpi	0
			IP_RNase H- (+)_0hpi	2.42614
			IP_RNase H- (+)_3hpi	2.19468
			IP_RNase H- (+)_6hpi	2.22637
			IP_RNase H- (+)_12hpi	2.36382
			IP_RNase H+ (-)_0hpi	2.57652
			IP_RNase H+ (-)_3hpi	3.45919
			IP_RNase H+ (-)_6hpi	1.62252
			IP_RNase H+ (-)_12hpi	1.87101
			IP_RNase H+ (+)_0hpi	1.78362
			IP_RNase H+ (+)_3hpi	2.3829
			IP_RNase H+ (+)_6hpi	1.05871
			IP_RNase H+ (+)_12hpi	1.43193
