# Supplementary material for: Human immunodeficiency virus-1 induces host genomic R-loops and preferentially integrates its genome near the R-loop regions
Source: eLife. 2024 Dec 3;13:RP97348. doi: 10.7554/eLife.97348 (PMC11616997; doi:10.7554/eLife.97348)
Supplement: Figure 2—figure supplement 2—source data 1. [file elife-97348-fig2-figsupp2-data1.xlsx]

## Sheet: Sheet1
	gene_symbol	0hpi	3hpi	6hpi	12hpi	48hpi
P1	TOR1AIP2	1	1.16383	1.2479	1.02493	0.619497
P2	DVL1	1	0.781593	0.571348	0.901502	0.270459
P3	PKN2	1	1.28097	1.89155	1.31842	1.51511
N1	N/A	N/A	N/A	N/A	N/A	N/A
N2	CDK5RAP1	1	0.73977	0.775	1.14366	0.472377
